# Supplementary material
Source: Springer Nature journal article supplement (https://mijn.bsl.nl/resource/supplementary/13047_2012_474_MOESM2_ESM.pdf/7111576)

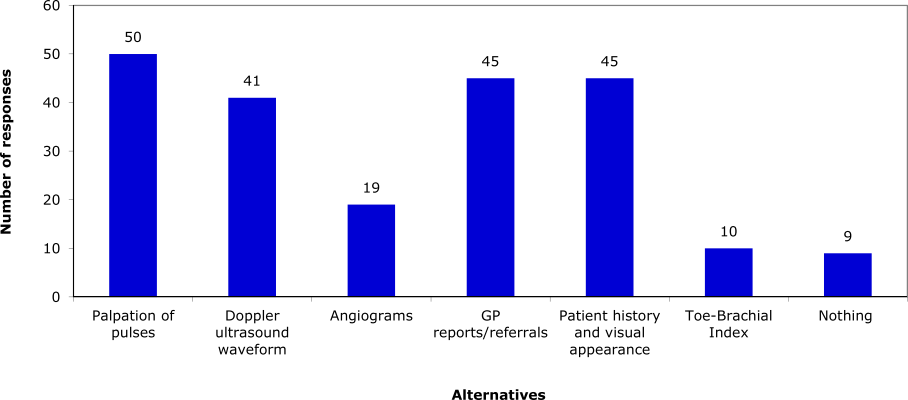

Supplement: MOESM2 [file 7111576]
